# Supplementary material for: Use of a primary care online consultation system, by whom, when and why: evaluation of a pilot observational study in 36 general practices in South West England
Source: PubMed Central journal article supplement — BMJ Open. 2017 Nov 22;7(11):e016901. doi: 10.1136/bmjopen-2017-016901 (PMC5701981; doi:10.1136/bmjopen-2017-016901), 2017-11-22
Supplement: bmjopen-2017-016901supp001.pdf [file bmjopen-2017-016901supp001.pdf]

**Supplementary Table 1. Unit cost sources of health and social care**

| <b>Resource</b>                                    | <b>Assumptions for costing units of resource<sup>1</sup></b>                                                                                                                                                                                           |
|----------------------------------------------------|--------------------------------------------------------------------------------------------------------------------------------------------------------------------------------------------------------------------------------------------------------|
| GP face to face appointments                       | Based on £33 per 11.7 minute GP consultation, excluding direct care staff costs and without qualification costs                                                                                                                                        |
| GP telephone calls                                 | Based on £20 per 7.1 minute GP consultation, , excluding direct care staff costs and without qualification costs                                                                                                                                       |
| GP complete phone calls (sensitivity analysis)     | Based on £2.9 per GP minute and observed 7.6 minutes of duration of audit GP telephone calls, excluding direct care staff costs and without qualification costs                                                                                        |
| GP failed telephone calls (sensitivity analysis)   | Based on £2.9 per GP minute and assumed 1 minute per failed GP contact, excluding direct care staff costs and without qualification costs                                                                                                              |
| Nurse face to face contacts <sup>2</sup>           | Based of £47 per hour and 15.5 average Nurse contact time, excluding qualification costs                                                                                                                                                               |
| Nurse telephone appointments                       | Based of £47 per hour and 15.5 average Nurse contact time, excluding qualification costs                                                                                                                                                               |
| Nurse face to face contacts (sensitivity analysis) | Based of £47 per hour, excluding qualification costs, and observed duration of nurse contact time. Given that data was unavailable for the initial e-consult response, we used nurse contact durations in the following 30 days.                       |
| Prescriptions                                      | Based on 2 minutes of GP time at £2.9 per minute                                                                                                                                                                                                       |
| Fit notes                                          | Based on 2 minutes of GP time at £2.9 per minute                                                                                                                                                                                                       |
| Routine referral letters                           | Based on 2 minutes of GP time at £2.9 per minute                                                                                                                                                                                                       |
| 2 week wait referral letters                       | Based on 2 minutes of GP time at £2.9 per minute                                                                                                                                                                                                       |
| GP given advice by email                           | Cost included in the GP-led triage cost (not costed)                                                                                                                                                                                                   |
| Other GP actions                                   | Cost included in the GP-led triage cost (not costed)                                                                                                                                                                                                   |
| Unknown GP actions                                 | Cost included in the GP-led triage cost (not costed)                                                                                                                                                                                                   |
| GP-led triage cost                                 | Based on £2.9 per GP minute and 4 minutes of PSSRU published average GP-led triage time of a teleconsultation. In sensitivity analyses we used our qualitative findings where GPs reported requiring 5 minutes to triage e-consultations in our study. |

1. All unit cost tariffs are published in the 2015 Curtis and Burns unit costs for health and social care, PSSRU

2. Includes treatment room and tests
